# Supplementary material for: Bridging the Chemical Profile and Biological Activities of a New Variety of Agastache foeniculum (Pursh) Kuntze Extracts and Essential Oil
Source: MDPI journal article supplement (doi:10.3390/ijms24010828), 2023-01-03
Supplement: s1 [file s1]

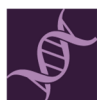

Supplementary Materials:

# Bridging the Chemical Profile and Biological Activities of a New Variety of *Agastache foeniculum* (Pursh) Kuntze Extracts and Essential Oil

Fănică Bălănescu <sup>1,2</sup>, Andreea Veronica Botezatu <sup>2,\*</sup>, Fernanda Marques <sup>3</sup>, Anna Busuioc <sup>2</sup>, Olivian Marincaș <sup>4</sup>, Costel Vinătoru <sup>5</sup>, Geta Cârâc <sup>2</sup>, Bianca Furdui <sup>2</sup> and Rodica Mihaela Dinica <sup>2,\*</sup>

<sup>1</sup> Faculty of Medicine and Pharmacy, “Dunărea de Jos” University of Galati, 35 A.I. Cuza Street, 800010 Galati, Romania

<sup>2</sup> Faculty of Sciences and Environment, Department of Chemistry Physical and Environment, “Dunărea de Jos” University of Galati, 111 Domnească Street, 800201 Galati, Romania

<sup>3</sup> Departamento de Engenharia e Ciências Nucleares (DECN), Centro de Ciências e Tecnologias Nucleares, Instituto Superior Técnico, University of Lisbon, Campus Tecnológico e Nuclear, Estrada Nacional 10, Km 139.7, 2695-066 Bobadela, Portugal

<sup>4</sup> National Institute for Research and Development of Isotopic and Molecular Technologies, 67-103 Donat Street, 400293 Cluj-Napoca, Romania

<sup>5</sup> Plant Genetic Resources Bank for Vegetables, Floriculture, Aromatic and Medicinal Plants Buzău, 56 Nicolae Bălcescu Street, 120187 Buzău, Romania

\* Correspondence: andreea.botezatu@ugal.ro (A.V.B.); rodica.dinica@ugal.ro (R.M.D.)

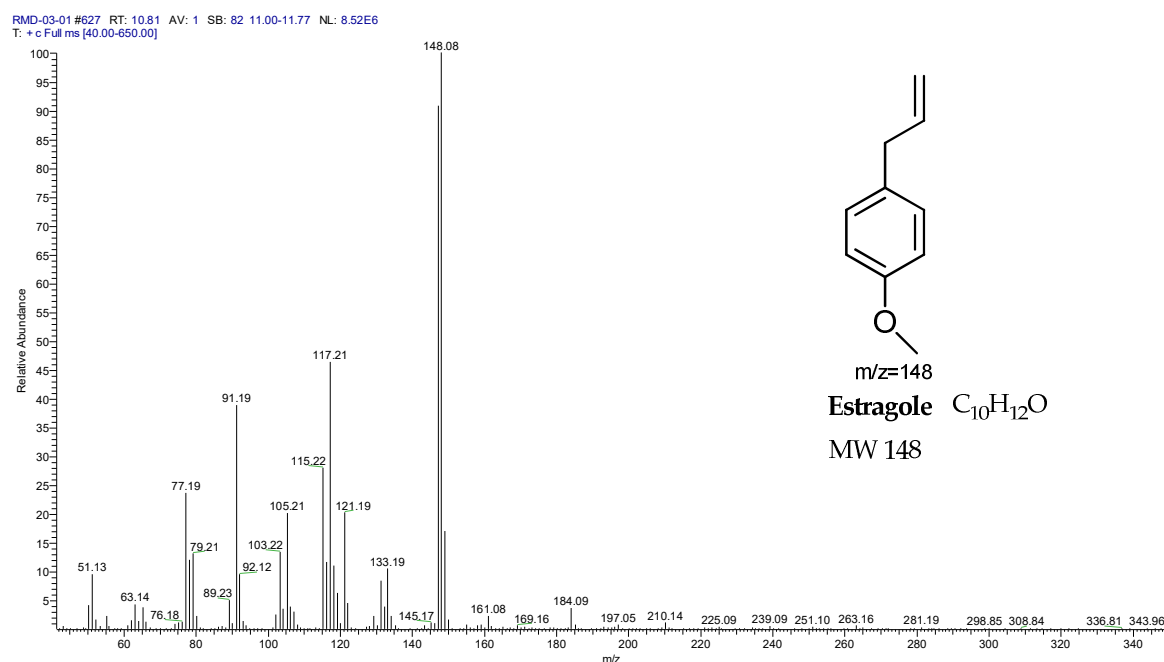

Figure S1. GC/MS spectra and fragmentation patterns of methyl chavicol (Estragole)

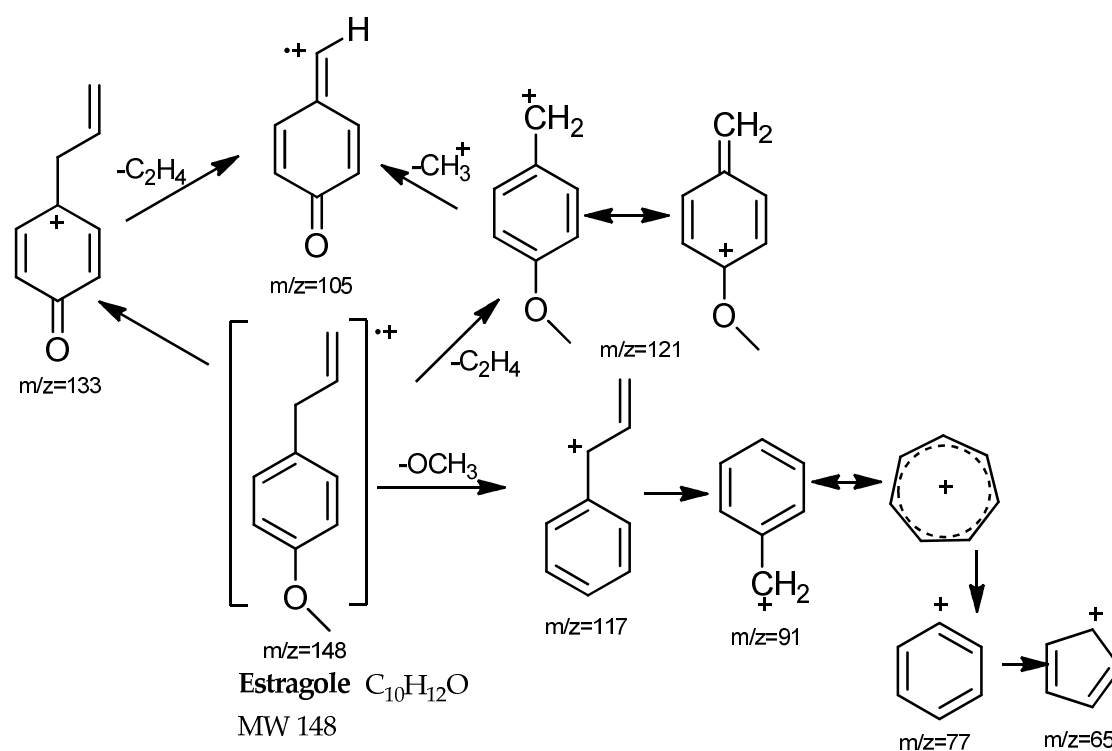

**Figure S2.** Mass spectrum interpretation of methyl chavicol (Estragole)

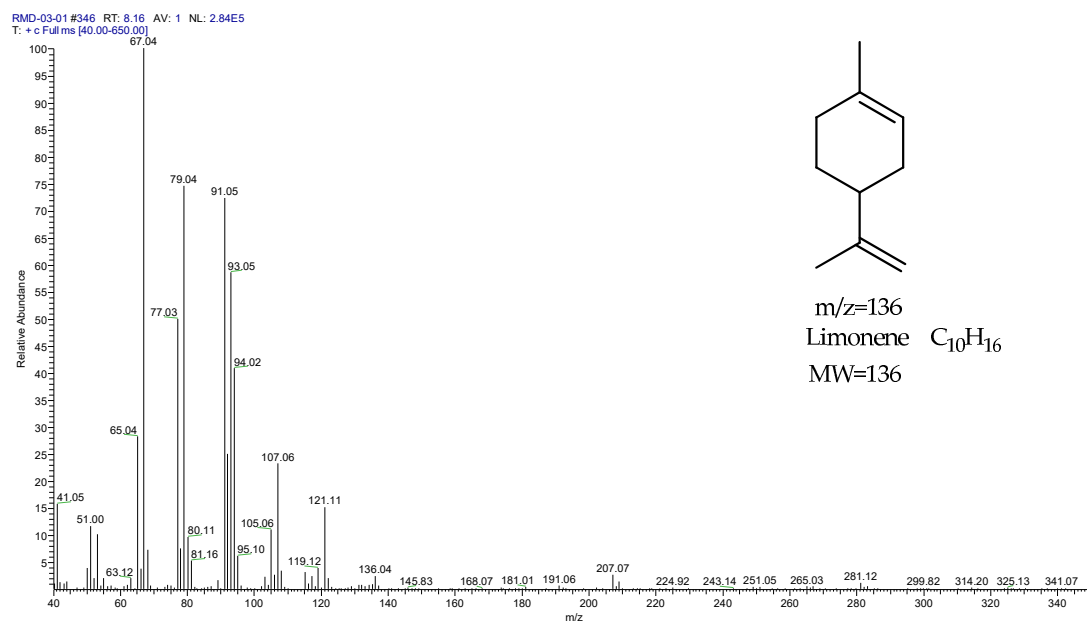

**Figure S3.** GC/MS spectra and fragmentation patterns of limonene

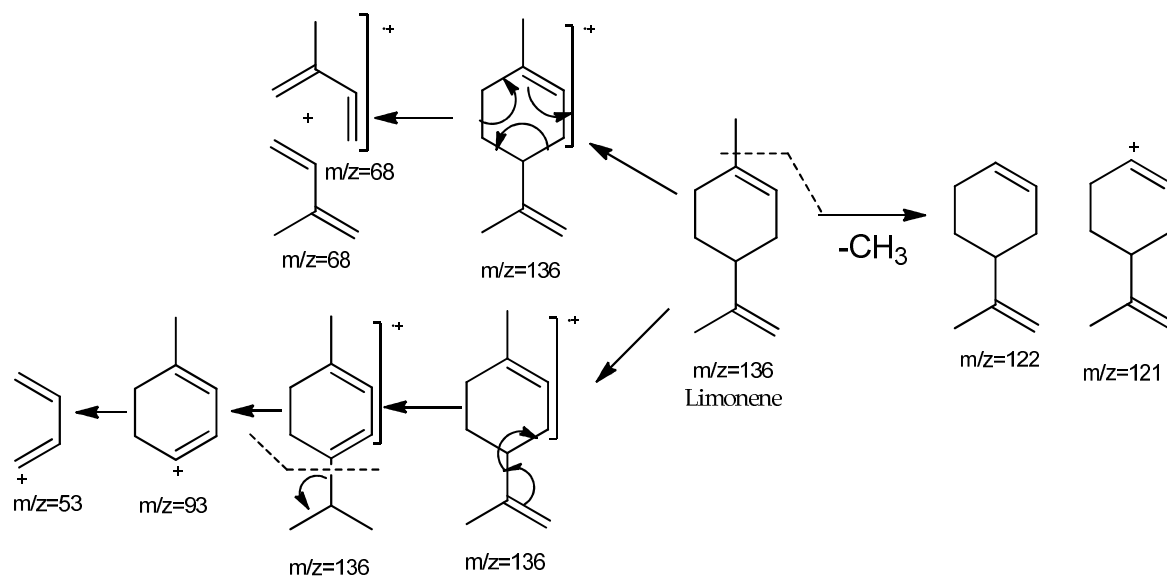

**Figure S4.** Mass spectrum interpretation of limonene

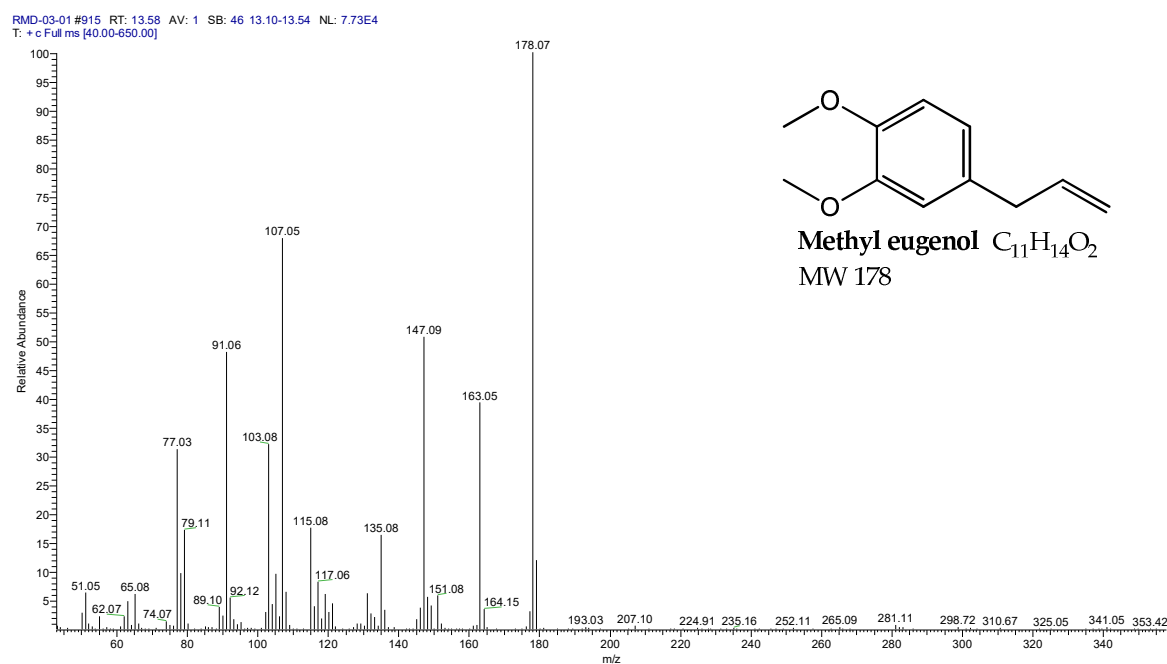

**Figure S5.** GC/MS spectra and fragmentation patterns of methyl eugenol

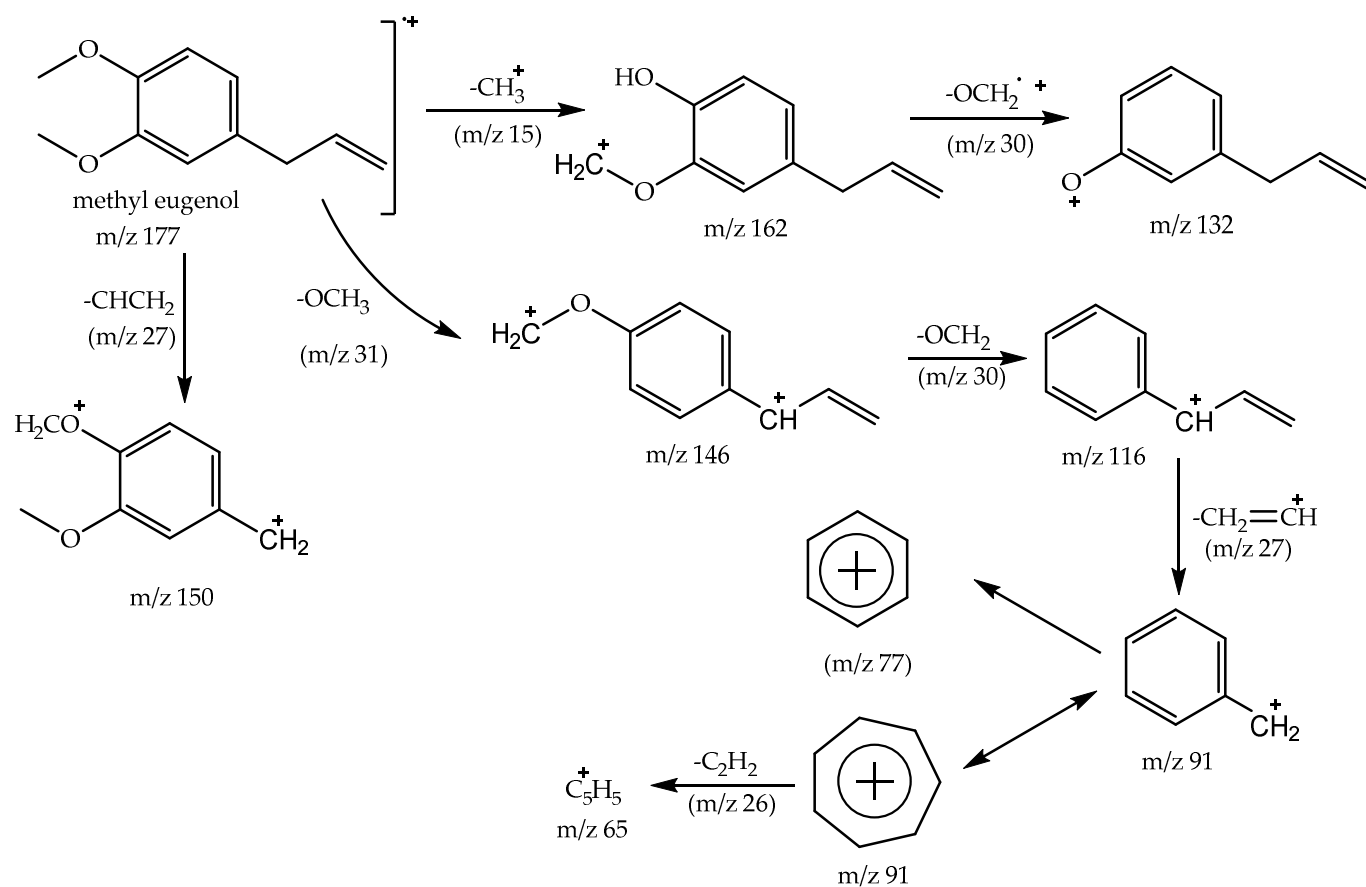

**Figure S6.** Mass spectrum interpretation of methyl eugenol

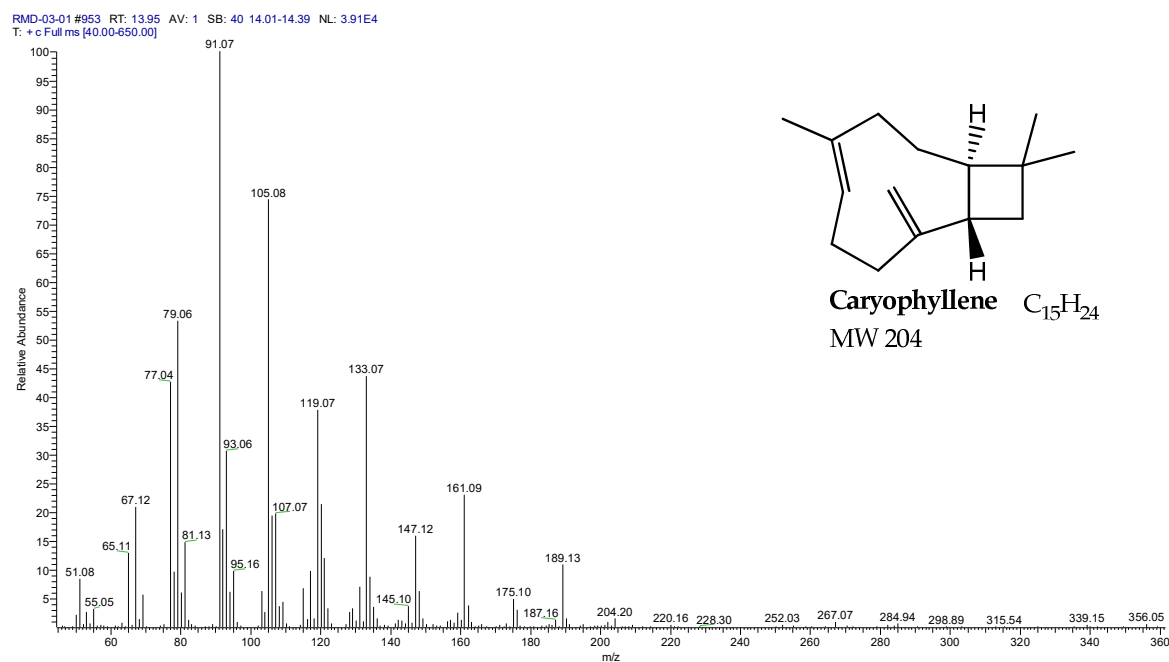

**Figure S7.** GC/MS spectra and fragmentation patterns of Caryophyllene

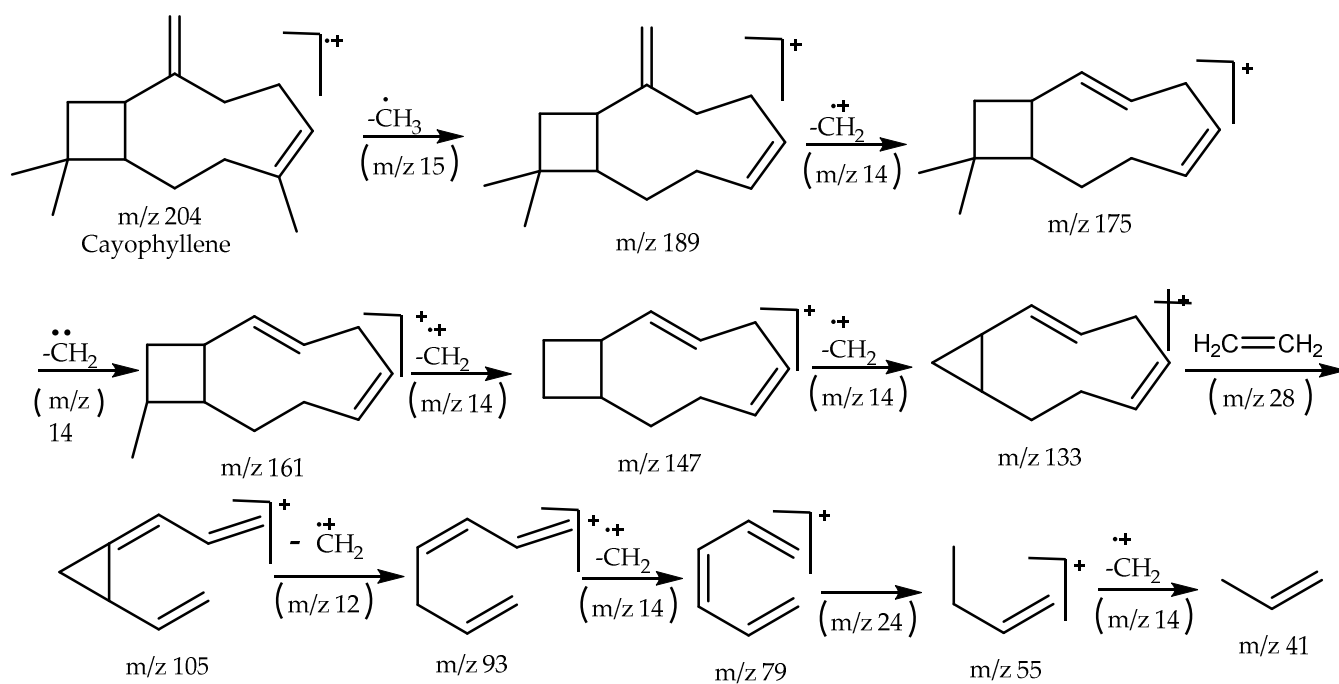

**Figure S8.** Mass spectrum interpretation of Caryophyllene
